# Supplementary material for: Bipolar cyano-substituted pyridine derivatives for applications in organic light-emitting devices
Source: Royal Society of Chemistry journal article supplement (doi:10.1039/c2jm00078d), 2012-01-01
Supplement: c2jm00078d.pdf [file c2jm00078d.pdf]

## Supplementary information for

# Bipolar cyano-substituted pyridine derivatives for applications in organic light-emitting devices

Juanjuan You, Shiu-Lun Lai, Weimin Liu, Tsz-Wai Ng, Pengfei Wang, and Chun-Sing Lee

## Contents

1. **Figure S1.** PL spectra of **5** in different solvents at room temperature.
2. **Figure S2.** Thermal properties measurements.
3. **Figure S3.** Electron mobility measurements of compounds **1-5**.
4. **Figure S4.** EL Spectra of Devices.

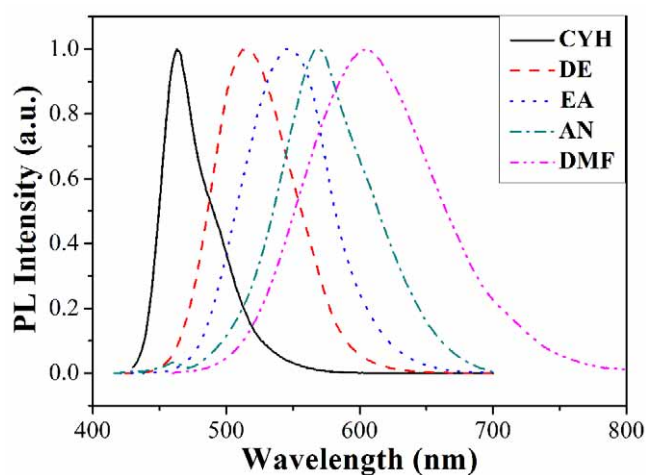

Figure S1. PL spectra of **5** in different solvents in room temperature. CYH=Cyclohexane, DE=Diethyl ether, EA=Ethyl acetate, AN=Acetonitrile, DMF=Dimethyl formamide.

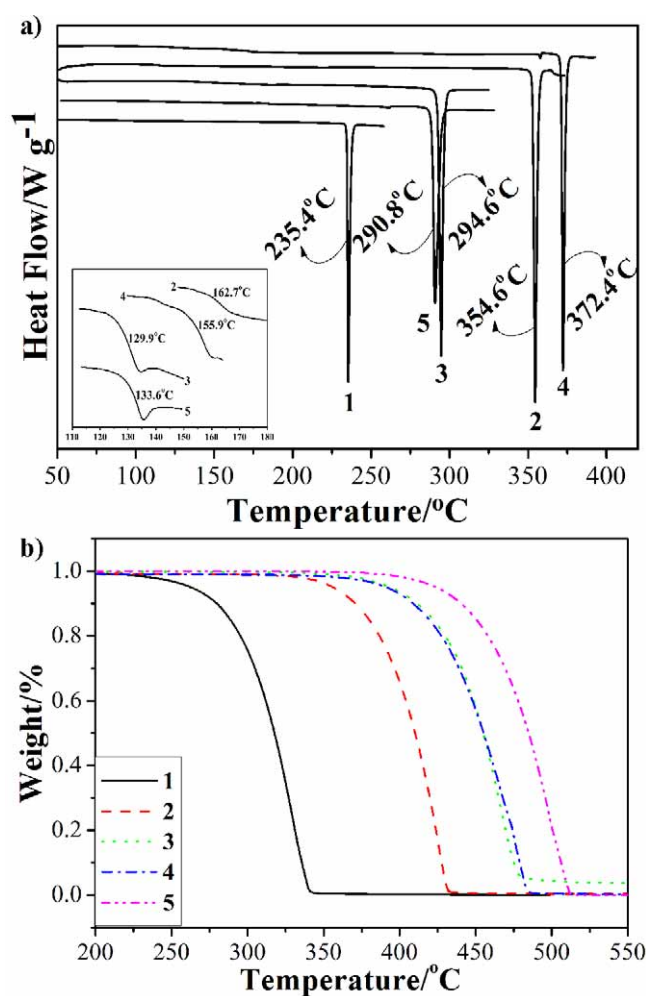

Figure S2. a): DSC data of 1-5. b): TGA data of 1-5.

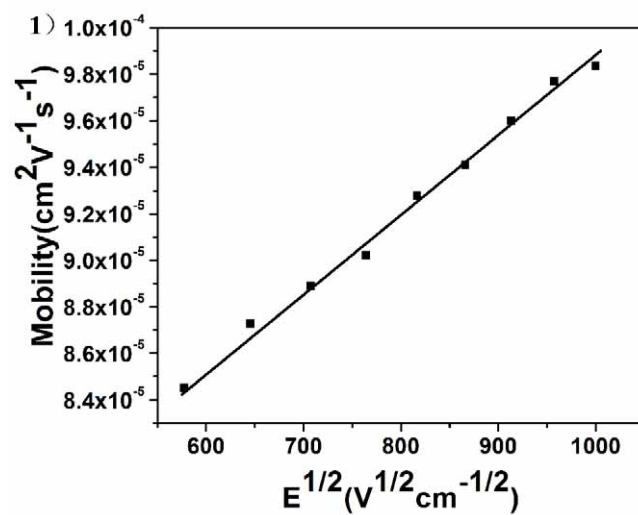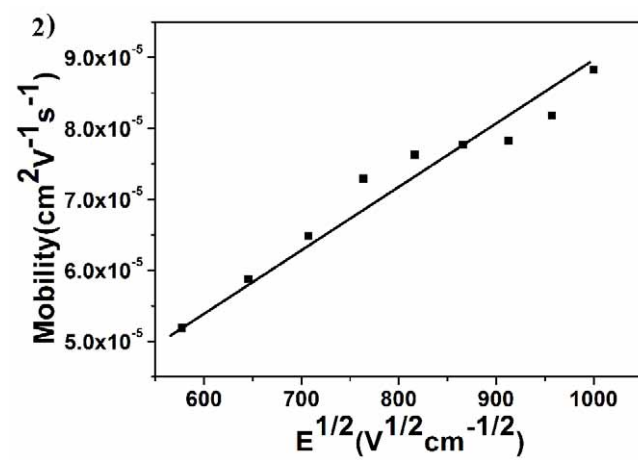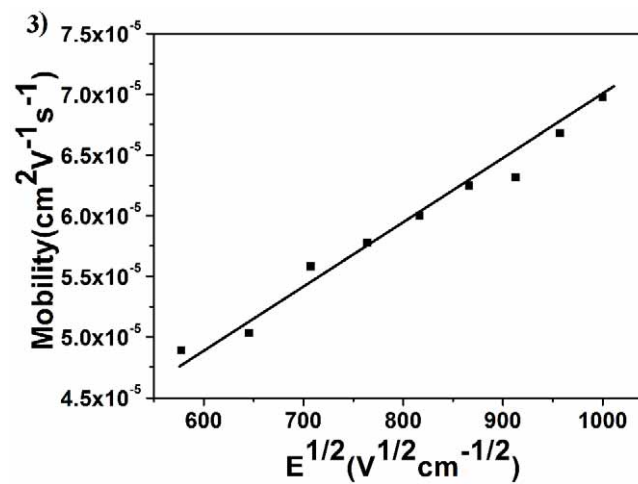

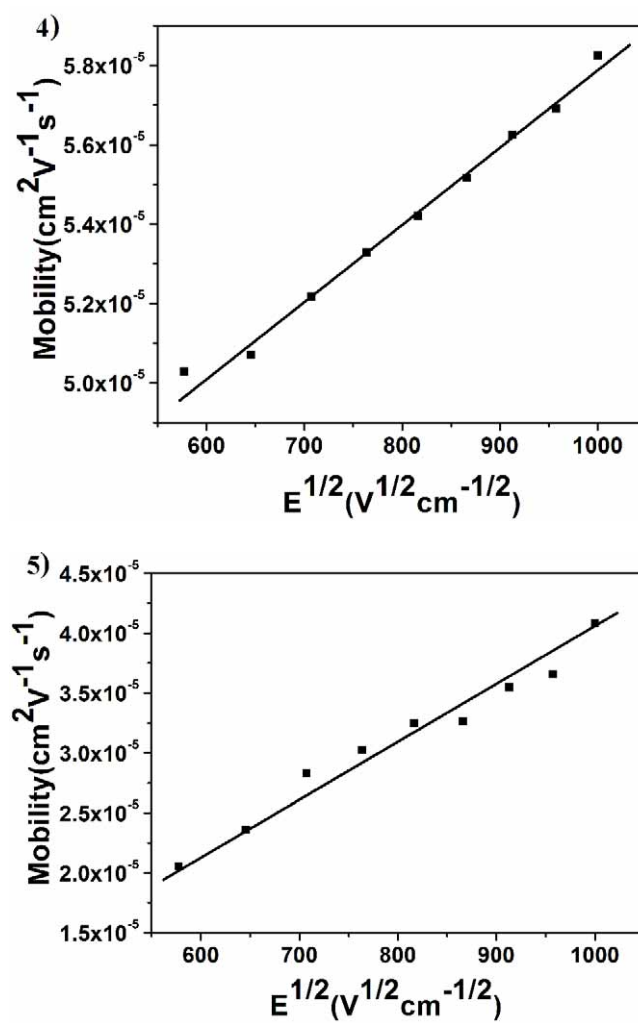

Figure S3. Electron mobilities of compounds 1-5.

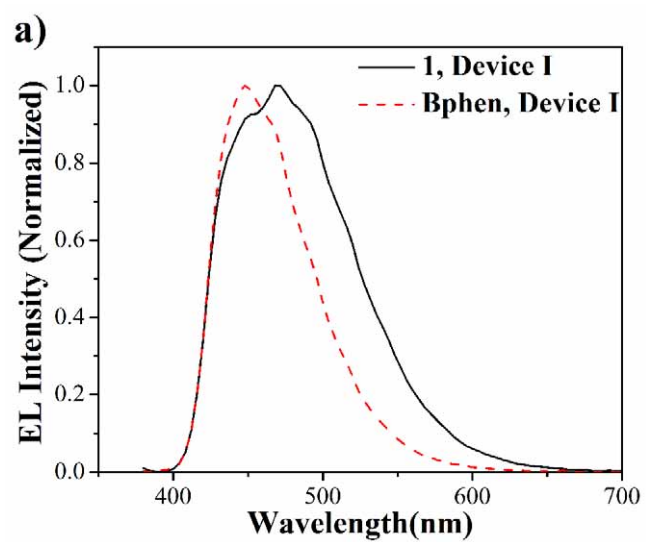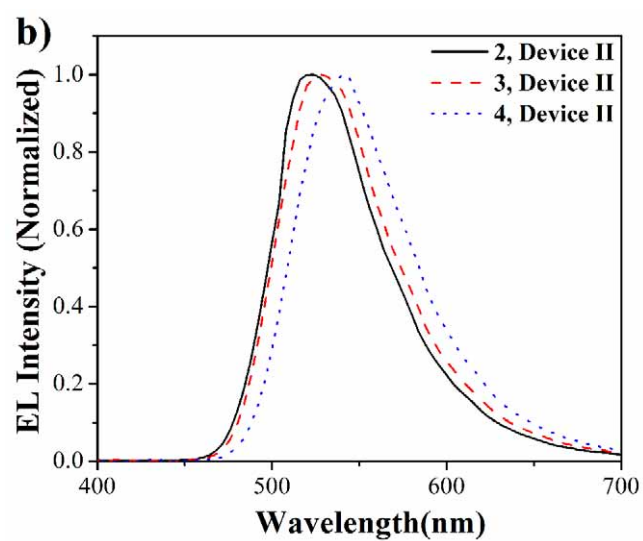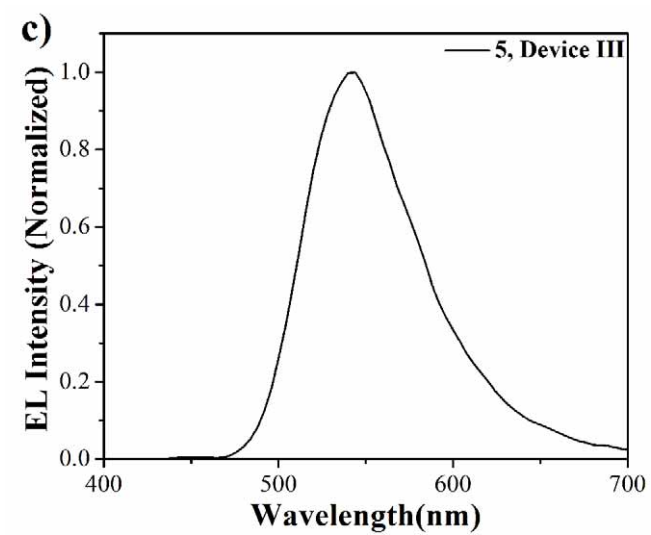

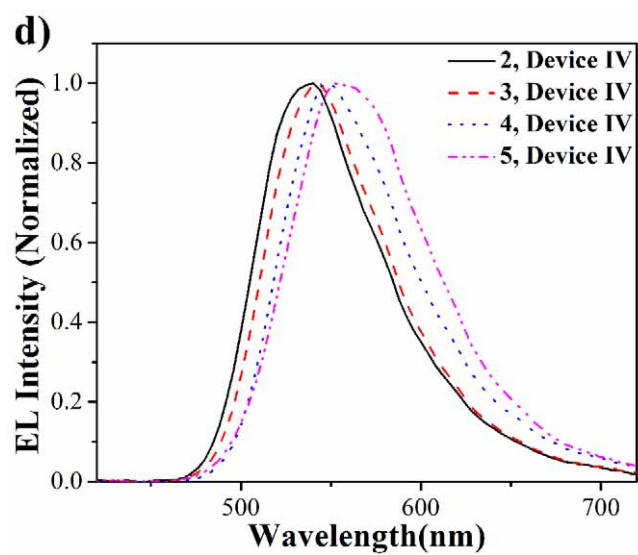

**Figure S4.** EL spectra of Devices. a): Device I; b): Device II; c): Device III; d): Device IV.
